# Supplementary material
Source: PubMed Central journal article supplement (PMC4352717)

**Copper-Catalyzed Synthesis of *N*-Aryl and *N*-Sulfonyl Indoles from 2-Vinylanilines with O<sub>2</sub> as the Terminal Oxidant and TEMPO as Co-Catalyst**

Timothy W. Liwosz and Sherry R. Chemler\*

Department of Chemistry, University at Buffalo,  
The State University of New York, Buffalo, NY 14260, [schemler@buffalo.edu](mailto:schemler@buffalo.edu)

**Supporting Information**

**Table of Contents**

|                                                                                                             |      |
|-------------------------------------------------------------------------------------------------------------|------|
| General Information                                                                                         | S-2  |
| Synthesis of Aniline Substrates                                                                             | S-2  |
| Representative Procedure for the Cu(eh) <sub>2</sub> / TEMPO-Catalyzed Aerobic Intramolecular C-H Amination | S-4  |
| Representative Procedure for the One-Pot Chan-Lam / C-H Amination                                           | S-7  |
| References                                                                                                  | S-9  |
| <sup>1</sup> H and <sup>13</sup> C Spectra                                                                  | S-10 |

## General Information:

All reagents were used out of the bottle as purchased from the supplier without further purification unless otherwise noted. Substrates **1a,e,g** were synthesized according to literature procedures.<sup>1</sup> Achiral bis(oxazoline) ligand **3** was synthesized according to the procedure reported by Miao et. al.<sup>2</sup> <sup>1</sup>H NMR spectra were recorded in CDCl<sub>3</sub> (using 7.26 ppm as internal reference) at 300, 400 or 500 MHz. <sup>13</sup>C NMR spectra were recorded in CDCl<sub>3</sub> (using 77.0 ppm as internal reference) at 75 MHz unless otherwise noted. <sup>19</sup>F NMR spectra were recorded in CDCl<sub>3</sub> with  $\alpha,\alpha,\alpha$ -trifluorotoluene as an internal reference. IR spectra were taken neat using a Nicolet-Impact 420 FTIR. Wave numbers in cm<sup>-1</sup> are reported for characteristic peaks. High resolution mass spectra were obtained at SUNY Buffalo's mass spec. facility on a ThermoFinnigan MAT XL spectrometer. Melting points are reported as uncorrected.

## Synthesis of Aniline Substrates:

### Substrates **1b-d,f**

Substrates **1b-d,f** were synthesized by sulfonylation of the corresponding aniline.

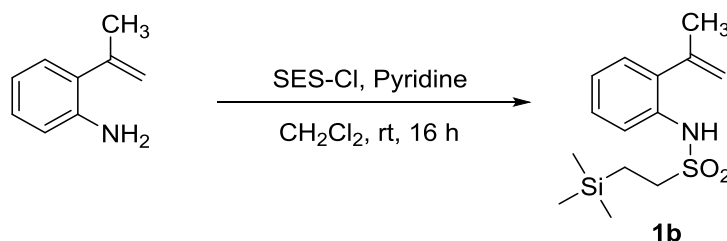

### N-(2-(Prop-1-en-2-yl)phenyl)-2-(trimethylsilyl)ethane-1-sulfonamide (**1b**)

The aniline (0.5 g, 3.75 mmol, 1 equiv) was dissolved in dry CH<sub>2</sub>Cl<sub>2</sub> (7.5 mL, 0.5 M), and the solution was treated with sulfonyl chloride (0.79 g, 4.13 mmol, 1.1 equiv) and pyridine (0.91 mL, 11.3 mmol, 3 equiv). The mixture was stirred at room temperature for 24 h, diluted with H<sub>2</sub>O (25 mL) and extracted with CH<sub>2</sub>Cl<sub>2</sub> (3 x 25 mL). The combined organic layers were washed with 1M HCl, brine, dried over Na<sub>2</sub>SO<sub>4</sub>, and concentrated in vacuo. Flash chromatography of the resulting crude mixture on SiO<sub>2</sub> (0-30% EtOAc in hexanes gradient) afforded the sulfonamides in good yields. Substrate **1b** was synthesized according to the above procedure using 2-isopropenylaniline and 2-(trimethylsilyl)ethanesulfonyl chloride. Sulfonamide **1b** was obtained (0.33 g, 97%) as a yellow oil. <sup>1</sup>H NMR (400 MHz, CDCl<sub>3</sub>):  $\delta$  7.56 (d, J = 8.0 Hz, 1H), 7.25 (t, J = 7.2 Hz, 1H), 7.16 (d, J = 8.0 Hz, 1H), 7.08 (t, J = 7.2 Hz, 1H), 6.83 (bs, 1H), 5.42 (t, J = 1.6 Hz, 1H), 5.02 (t, J = 0.8 Hz, 1H), 3.06-3.02 (m, 2H), 2.08 (d, J = 1.6 Hz, 3H), 1.01-0.98 (m, 2H), -0.20 (s, 9H). <sup>13</sup>C NMR (75 Hz, CDCl<sub>3</sub>)  $\delta$  142.0, 133.4, 133.3, 128.3, 123.8, 118.2, 117.6, 48.1, 24.6, 10.4, -2.1; IR (neat): 3343, 3288, 2953, 1493, 1396, 1335, 1251, 1169, 1149, 911, 861, 841, 761 cm<sup>-1</sup>; HRMS (EI) calcd for [M]<sup>+</sup> C<sub>14</sub>H<sub>23</sub>O<sub>2</sub>NSSi: 297.1204, found: 297.1213.

### 3-Nitro-4-((2-(prop-1-en-2-yl)phenyl)amino)benzenesulfonic acid (**1c**)<sup>3</sup>

Substrate **1c** was synthesized according to the above procedure using 2-isopropenylaniline and *p*-nitrobenzenesulfonyl chloride. The known sulfonamide **1c** was obtained (0.48 g, 99%) as a yellow solid. <sup>1</sup>H NMR (400 MHz, CDCl<sub>3</sub>):  $\delta$  8.27 (d, J = 8 Hz, 2H), 7.94-7.91 (m, 2H), 7.63 (d, J = 8.4 Hz, 1H), 7.26 (t, J = 7.2 Hz, 1H), 7.13-7.04 (m, 2H), 5.28 (t, J = 1.6 Hz, 1H), 4.67 (s, 1H), 1.70 (s, 3H).

### N-(2-(Prop-1-en-2-yl)phenyl)methanesulfonamide (**1d**)<sup>4</sup>

Substrate **1d** was synthesized according to the above procedure using 2-isopropenylaniline and methanesulfonyl chloride. The known sulfonamide **1d** was obtained (0.3 g, 99%) as a colorless oil. <sup>1</sup>H NMR (400 MHz, CDCl<sub>3</sub>): δ 7.59 (d, J = 8.0 Hz, 1H), 7.28 (t, J = 8.0 Hz, 1H), 7.18 (d, J = 7.6 Hz, 1H), 7.12 (t, J = 7.6 Hz, 1H), 6.85 (bs, 1H), 5.42-5.41 (m, 1H), 5.01-5.00 (m, 1H), 3.01 (s, 3H), 2.08-2.07 (m, 3H).

### (E,Z)-4-Methyl-N-(2-(1-phenylprop-1-en-1-yl)phenyl)benzenesulfonamide (**1f**)

Substrate **1f** was synthesized according to the above procedure using 2-(1-phenylprop-1-en-1-yl)aniline<sup>5</sup> and p-toluenesulfonyl chloride. Sulfonamide **1f** was obtained (0.14 g, 88%) as a colorless oil in a 3:2 Z:E ratio. Product characterized as a mixture of isomers. <sup>1</sup>H NMR (400 MHz, CDCl<sub>3</sub>): δ 7.74 (d, J = 7.6 Hz, 1H), 7.57 (d, J = 8.4 Hz, 0.6H), 7.46 (d, J = 8.8 Hz, 2H), 7.37 (d, J = 8.4 Hz, 1.3H), 7.32-7.07 (m, 13H), 7.00-6.93 (m, 4H), 6.54 (bs, 1H), 6.42 (bs, 0.6H), 6.38 (q, J = 7.2 Hz, 1H), 5.42 (q, J = 7.2 Hz, 0.6H), 2.38 (s, 2H), 2.36 (s, 3H), 1.77 (d, J = 6.8 Hz, 2H), 1.47 (d, J = 7.2 Hz, 3H); <sup>13</sup>C NMR (75 Hz, CDCl<sub>3</sub>) δ 143.6, 143.5, 139.6, 138.1, 137.0, 136.1, 134.6, 134.0, 130.8, 129.5, 129.4, 129.0, 128.9, 128.7, 128.6, 128.3, 127.7, 127.7, 127.4, 127.2, 127.2, 125.9, 124.9, 124.2, 121.7, 119.0, 21.5, 15.4, 15.3; IR (neat): 3326, 3057, 1491, 1396, 1336, 1166, 1090, 918, 760, 667 cm<sup>-1</sup>; HRMS (ESI) calcd for [M+Na]<sup>+</sup> C<sub>22</sub>H<sub>21</sub>O<sub>2</sub>NNaS: 386.1199, found: 386.1185.

### Substrates **1h-j**

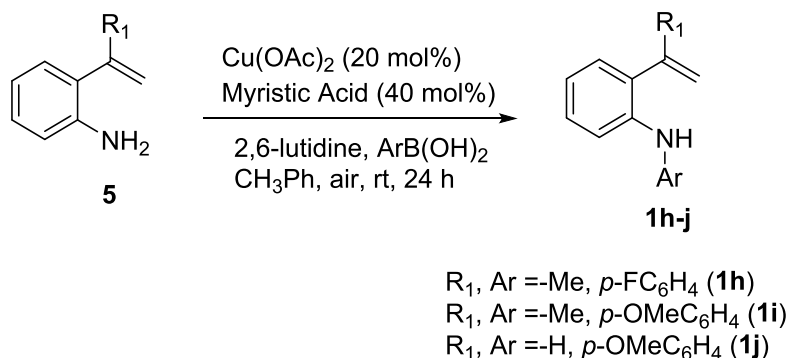

Substrates **1h-j** were synthesized using a procedure reported by Buchwald et. al.<sup>6</sup> The ArB(OH)<sub>2</sub> (0.28 g, 2.26 mmol, 1.2 equiv), Cu(OAc)<sub>2</sub> (0.07 g, 0.38 mmol, 0.2 equiv) and myristic acid (0.172 g, 0.75 mmol, 0.4 equiv) were dissolved in toluene (3.8 mL, 0.5M) in a 100 mL round bottom flask. The reaction was stirred and 2,6-lutidine (0.22 mL, 1.88 mmol, 1 equiv) and the corresponding aniline (0.26 mL, 1.88 mmol, 1 equiv) were added. The reaction was stirred at room temperature with the flask uncapped and open to air for 24 h. The reaction was filtered through a SiO<sub>2</sub> plug with ether (100 mL) and the filtrate was condensed. Crude mixtures were purified via flash chromatography on SiO<sub>2</sub> (0-10% Et<sub>2</sub>O in hexanes gradient) to afford the anilines in high yields.

### N-(4-Fluorophenyl)-2-(prop-1-en-2-yl)aniline (**1h**)

Substrate **1h** was synthesized according to the above procedure using 2-isopropenylaniline and 4-fluorophenylboronic acid. Aniline **1h** was obtained (0.22 g, 65%) as a yellow oil. <sup>1</sup>H NMR (400 MHz, CDCl<sub>3</sub>): δ 7.18-7.15 (m, 3H), 7.07-6.97 (m, 4H), 6.92-6.87 (m, 1H), 5.80 (bs, 1H), 5.32 (q, J = 2.2 Hz, 1H), 5.08 (t, J = 1.6 Hz, 1H), 2.09 (d, J = 2.4 Hz, 3H); <sup>13</sup>C NMR (75 Hz,

$\text{CDCl}_3$ )  $\delta$  158.1 (d,  $J_{\text{CF}} = 239.3$ ), 143.8, 140.2, 139.3, 139.3, 132.8, 128.7, 127.8, 120.7, 120.5 (d,  $J_{\text{CF}} = 45.8$ ), 116.1, 116.0 (d,  $J_{\text{CF}} = 5.7$  Hz), 115.7, 24.0;  $^{19}\text{F}$  NMR (282 MHz,  $\text{CDCl}_3$ ):  $\delta$  -123.1; IR (neat): 3407, 3076, 2968, 1575, 1508, 1450, 1310, 1218, 821, 757  $\text{cm}^{-1}$ ; HRMS (EI) calcd for  $[\text{M}]^+$   $\text{C}_{15}\text{H}_{14}\text{FN}$ : 227.1098, found: 227.1105.

### N-(4-Methoxyphenyl)-2-(prop-1-en-2-yl)aniline (**1i**)<sup>7</sup>

Substrate **1i** was synthesized according to the above procedure using 2-isopropenylaniline and 4-methoxyphenylboronic acid. The known aniline **1i** was obtained (0.18 g, 79%) as a yellow oil.  $^1\text{H}$  NMR (400 MHz,  $\text{CDCl}_3$ ):  $\delta$  7.12-7.01 (m, 5H), 6.88-6.79 (m, 3H), 5.74 (bs, 1H), 5.32 (s, 1H), 5.09 (s, 1H), 3.80 (s, 3H), 2.09 (s, 3H).

### N-(4-methoxyphenyl)-2-vinylaniline (**1j**)<sup>7</sup>

Substrate **1j** was synthesized according to the above procedure using 2-vinylaniline and 4-methoxyphenylboronic acid. The known aniline **1j** was obtained (0.24 g, 62%) as a yellow oil.  $^1\text{H}$  NMR (400 MHz,  $\text{CDCl}_3$ ):  $\delta$  7.41 (d,  $J = 8$  Hz, 1H), 7.15 (t,  $J = 6.8$  Hz, 1H), 7.04 (d,  $J = 7.6$  Hz, 1H), 7.00-6.97 (m, 2H), 6.92-6.85 (m, 4H), 5.68 (dd,  $J = 17.6, 1.6$  Hz, 1H), 5.41 (bs, 1H), 5.33 (dd,  $J = 10.4, 1.6$  Hz, 1H), 3.80 (s, 3H).

### Representative Procedure for the $\text{Cu}(\text{eh})_2$ / TEMPO-Catalyzed Aerobic Intramolecular C-H Amination

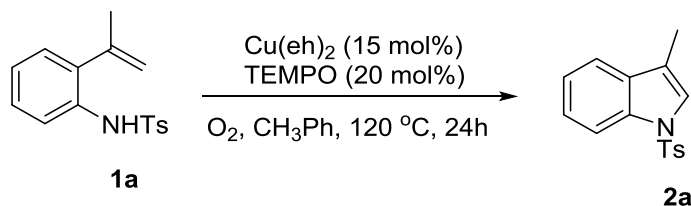

### 3-Methyl-1-tosyl-1H-indole (**2a**)<sup>1</sup>

To an oven dried 100 mL round bottom flask was charge with **1a** (50 mg, 0.174 mmol, 1 equiv),  $\text{Cu}(\text{eh})_2$  (9 mg, 0.026 mmol, 0.15 equiv), TEMPO (5 mg, 0.035 mmol, 0.2 equiv) and toluene (1.74 mL, 0.1M). The flask was purged with  $\text{O}_2$ , put under an  $\text{O}_2$  atmosphere using an  $\text{O}_2$  balloon and stirred for 24 h at 120  $^\circ\text{C}$ . Filtration of the cooled reaction mixture through a pad of silica gel with ethyl acetate (100 mL), and subsequent evaporation of the solvent in vacuo afforded crude mixture. Flash chromatography of the resulting crude mixture on silica gel (0-20% ethyl acetate in hexanes gradient) afforded the known indole **2a** (36 mg, 71% yield) as an off-white solid.  $^1\text{H}$  NMR (400 MHz,  $\text{CDCl}_3$ ):  $\delta$  7.99 (d,  $J = 8.4$  Hz, 1H), 7.74 (d,  $J = 8.0$  Hz, 2H), 7.45 (d,  $J = 7.2$  Hz, 1H), 7.34-7.29 (m, 2H), 7.26-7.22 (m, 1H), 7.19 (d,  $J = 8.4$  Hz, 2H), 2.32 (s, 3H), 2.24 (d,  $J = 0.8$  Hz, 3H).

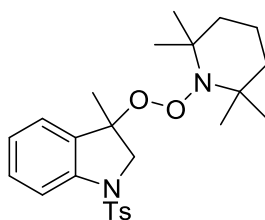

### 3-Methyl-3-((2,2,6,6-tetramethylpiperidin-1-yl)peroxy)-1-tosylindole (**2aa**)

The TEMPO-peroxide product **2aa** was obtained (15 mg, 20% yield) as an off-white solid.  $^1\text{H}$  NMR (400 MHz,  $\text{CDCl}_3$ ):  $\delta$  7.66-7.61 (m, 3H), 7.40 (t,  $J = 7.2$  Hz, 1H), 7.32-7.22 (m, 5H), 6.98

(d,  $J = 8.1$  Hz, 1H), 5.73 (d,  $J = 9.6$  Hz, 1H), 4.81 (d,  $J = 9.6$  Hz, 1H), 2.60 (s, 3H), 2.43 (s, 3H), 1.58-1.25 (m, 9H), 1.13 (s, 3H), 0.96 (s, 3H), 0.67 (s, 3H);  $^{13}\text{C}$  NMR (75 Hz,  $\text{CDCl}_3$ )  $\delta$  143.6, 141.4, 137.1, 136.1, 132.1, 130.8, 129.2, 128.9, 128.8, 128.2, 84.9, 59.9, 39.8, 33.0, 32.0, 30.0, 29.7, 21.6, 20.3, 20.2, 16.9; IR (neat): 2973, 2928, 2871, 1697, 1347, 1165, 1141, 1024, 869, 814, 686, 660  $\text{cm}^{-1}$ ; HRMS (ESI) calcd for  $[\text{M}+\text{H}]^+ \text{C}_{25}\text{H}_{35}\text{O}_4\text{N}_2\text{S}$ : 459.2312, found: 459.2301.

### Possible Mechanistic Pathway to **2aa**

The following scheme shows a possible rationale for product **2aa**. After *N*-radical addition to the alkene (see **Scheme 2** in manuscript), oxygen can trap the benzylic radical. Reduction by  $[\text{Cu}(\text{I})]$  and protonation can give a peroxide intermediate that undergoes either Cu-catalyzed or thermal homolysis to an alkoxy radical that can then be trapped by TEMPO to yield **2aa**.

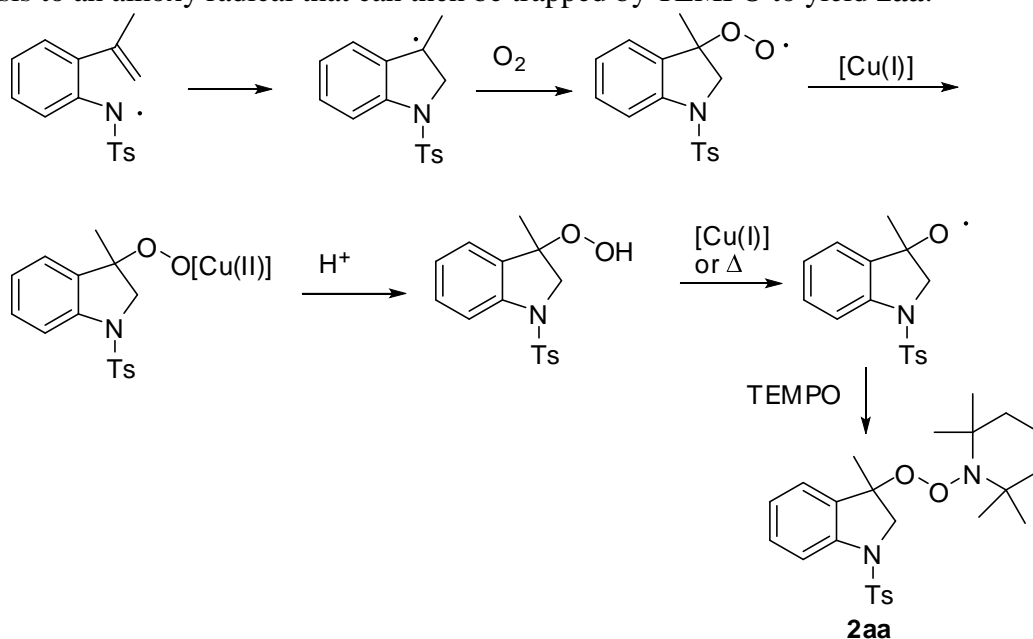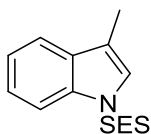

### 3-Methyl-1-((2-(trimethylsilyl)ethyl)sulfonyl)-1H-indole (**2b**)

The indole **2b** was obtained (27 mg, 55% yield) as a colorless oil.  $^1\text{H}$  NMR (400 MHz,  $\text{CDCl}_3$ ):  $\delta$  7.87 (d,  $J = 7.6$  Hz, 1H), 7.56 (d,  $J = 7.6$  Hz, 1H), 7.35-7.30 (m, 2H), 7.21 (s, 1H), 3.15-3.10 (m, 2H), 2.30 (d,  $J = 1.2$  Hz, 3H), 0.90-0.84 (m, 2H), -0.05 (s, 9H);  $^{13}\text{C}$  NMR (75 Hz,  $\text{CDCl}_3$ )  $\delta$  135.4, 131.5, 124.6, 123.6, 122.8, 119.5, 117.1, 113.1, 50.3, 9.9, 9.6, -2.2; IR (neat): 2954, 2922, 1448, 1365, 1273, 1252, 1174, 1158, 1121, 1001, 972, 860, 841, 756, 680  $\text{cm}^{-1}$ ; HRMS (EI) calcd for  $[\text{M}]^+ \text{C}_{14}\text{H}_{21}\text{O}_2\text{NSSi}$ : 295.1057, found: 295.1057.

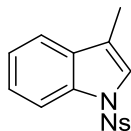

### 3-Methyl-1-((4-nitrophenyl)sulfonyl)-1H-indole (**2c**)<sup>3</sup>

The known indole **2c** was obtained (25 mg, 51% yield) as a yellow solid. <sup>1</sup>H NMR (300 MHz, CDCl<sub>3</sub>): δ 8.24 (d, J = 9.0 Hz, 2H), 8.03-7.96 (m, 3H), 7.46 (d, J = 8.1 Hz, 1H), 7.37-7.28 (m, 3H), 2.25 (s, 3H).

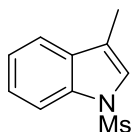

### 3-Methyl-1-(methylsulfonyl)-1H-indole (**2d**)<sup>4</sup>

The known indole **2d** was obtained (25 mg, 50% yield) as a white solid. <sup>1</sup>H NMR (400 MHz, CDCl<sub>3</sub>): δ 7.90 (d, J = 8.0 Hz, 1H), 7.56 (d, J = 7.6 Hz, 1H), 7.39-7.31 (m, 2H), 7.20 (s, 1H), 3.03 (s, 3H), 2.30 (s, 3H).

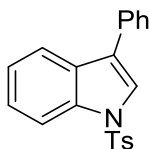

### 3-Phenyl-1-tosyl-1H-indole (**2e**)<sup>1</sup>

The known indole **2e** was obtained (36 mg, 73% yield) as a pale yellow solid. <sup>1</sup>H NMR (400 MHz, CDCl<sub>3</sub>): δ 8.06 (d, J = 8.0 Hz, 1H), 7.82-7.77 (m, 3H), 7.70 (s, 1H), 7.61 (d, J = 8.0 Hz, 2H), 7.47 (t, J = 7.4 Hz, 2H), 7.39-7.35 (m, 2H), 7.30-7.22 (m, 3H), 2.34 (s, 3H)

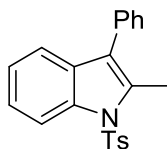

### 2-Methyl-3-phenyl-1-tosyl-1H-indole (**2f**)<sup>8</sup>

The known indole **2f** was obtained (11 mg, 22% yield) from a 3:2 Z:E ratio of alkene isomers as an off-white solid. Obtained a 22% yield of unreacted (Z)-isomer after reaction. <sup>1</sup>H NMR (300 MHz, CDCl<sub>3</sub>): δ 8.26 (d, J = 8.1 Hz, 1H), 7.72 (d, J = 8.1 Hz, 2H), 7.46-7.19 (m, 10H), 2.60 (s, 3H), 2.37 (s, 3H).

When reaction was run with exclusively the (E)-isomer the product was obtained in a 43% yield. When the (Z)-isomer was run it was determined to be unreactive under the reaction conditions.

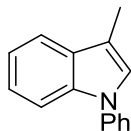

### 3-Methyl-1-phenyl-1H-indole (2g)<sup>1</sup>

The known indole **2g** was obtained (41 mg, 82% yield) as a yellow oil. <sup>1</sup>H NMR (400 MHz, CDCl<sub>3</sub>): δ 7.63 (d, J = 8.0 Hz, 1H), 7.56 (d, J = 7.6 Hz, 1H), 7.50-7.47 (m, 4H), 7.32-7.29 (m, 1H), 7.25-7.14 (m, 3H), 2.40 (d, J = 1.2 Hz, 3H)

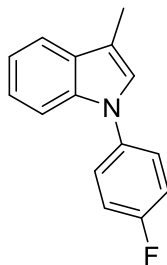

### 1-(4-Fluorophenyl)-3-methyl-1H-indole (2h)<sup>9</sup>

The known indole **2h** was obtained (40 mg, 81% yield) as a yellow oil. <sup>1</sup>H NMR (300 MHz, CDCl<sub>3</sub>): δ 7.63 (d, J = 6.6 Hz, 1H), 7.47-7.41 (m, 3H), 7.25-7.16 (m, 4H), 7.08 (s, 1H), 2.40 (s, 3H).

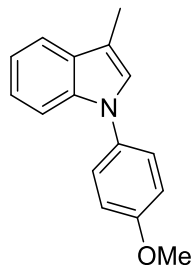

### 1-(4-Methoxyphenyl)-3-methyl-1H-indole (2i)<sup>7</sup>

The known indole **2i** was obtained (42 mg, 85% yield) as a yellow oil. <sup>1</sup>H NMR (300 MHz, CDCl<sub>3</sub>): δ 7.62 (d, J = 7.2 Hz, 1H), 7.44 (d, J = 6.6 Hz, 1H), 7.39 (d, J = 7.2 Hz, 2H), 7.21-7.13 (m, 2H), 7.07 (s, 1H), 7.02 (d, J = 7.2 Hz, 2H), 3.88 (s, 3H), 2.39 (d, J = 1.2 Hz, 3H).

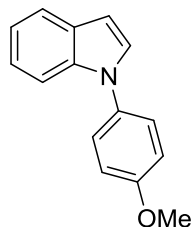

### 1-(4-Methoxyphenyl)-1H-indole (2j)<sup>7</sup>

The known indole **2j** was obtained (27 mg, 55% yield) as a yellow oil. <sup>1</sup>H NMR (300 MHz, CDCl<sub>3</sub>): δ 7.70 (d, J = 8.4 Hz, 1H), 7.47 (d, J = 8.4 Hz, 1H), 7.41 (d, J = 6.6 Hz, 2H), 7.29 (d, J = 3 Hz, 1H), 7.22-7.15 (m, 2H), 7.04 (d, J = 6.9 Hz, 2H), 6.67 (d, J = 2.4 Hz, 1H), 3.89 (s, 3H).

### Representative Procedure for the One-Pot Chan-Lam Coupling / C-H Amination

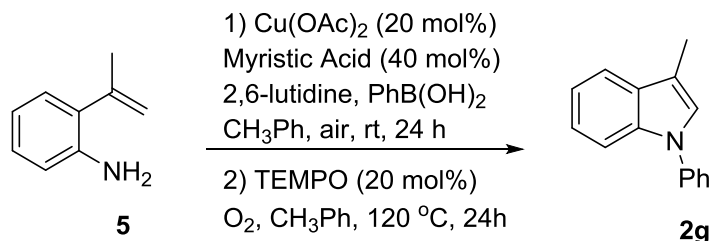

#### 3-Methyl-1-phenyl-1H-indole (**2g**)<sup>1</sup>

$\text{PhB}(\text{OH})_2$  (0.15 g, 1.2 mmol, 1.2 equiv),  $\text{Cu}(\text{OAc})_2$  (0.036 g, 0.2 mmol, 0.2 equiv) and myristic acid (0.091 g, 0.4 mmol, 0.4 equiv) were dissolved in toluene (2 mL, 0.5M). The reaction was stirred, 2,6-lutidine (0.12 mL, 1 mmol, 1 equiv) and 2-isopropenylaniline (0.14 mL, 1 mmol, 1 equiv) were added. The reaction was stirred at room temperature exposed to air for 24 h. TEMPO (0.031 g, 0.2 mmol, 0.2 equiv) and toluene (8 mL, 0.1M overall) were then added. The flask was purged with  $\text{O}_2$ , put under an  $\text{O}_2$  atmosphere using an  $\text{O}_2$  balloon and stirred for 24 h at 120 °C. Filtration of the cooled reaction mixture through a pad of silica gel with ethyl acetate (100 mL), and subsequent evaporation of the solvent in vacuo afforded crude mixtures. Flash chromatography of the resulting crude mixture on silica gel (0-5% diethyl ether in hexanes gradient) afforded the known indole **2g** (0.11 g, 53% yield) as a yellow liquid.

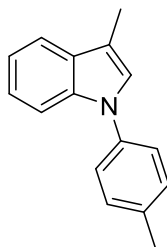

#### 3-Methyl-1-(p-tolyl)-1H-indole (**1k**)<sup>10</sup>

The known indole **2k** was obtained (0.12 g, 54% yield) as a yellow oil from the one-pot reaction using *p*-tolylboronic acid.  $^1\text{H}$  NMR (400 MHz,  $\text{CDCl}_3$ ):  $\delta$  7.63 (d,  $J$  = 7.2 Hz, 1H), 7.52 (d,  $J$  = 8.0 Hz, 1H), 7.37 (d,  $J$  = 8.4 Hz, 2H), 7.30 (d,  $J$  = 8.4 Hz, 2H), 7.24-7.15 (m, 2H), 7.12 (s, 1H), 2.43 (s, 3H), 2.39 (d,  $J$  = 1.2 Hz, 3H).

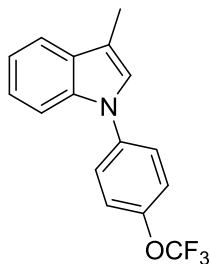

#### 3-Methyl-1-(4-(trifluoromethoxy)phenyl)-1H-indole (**2l**)

The indole **2l** was obtained (0.12 g, 42% yield) as a yellow oil from the one-pot reaction using 4-(trifluoromethoxy)phenyl boronic acid.  $^1\text{H}$  NMR (300 MHz,  $\text{CDCl}_3$ ):  $\delta$  7.63 (d,  $J$  = 7.8 Hz, 1H),



7.54-7.49 (m, 3H), 7.35 (d,  $J = 8.7$  Hz, 2H), 7.27-7.17 (m, 2H), 7.10 (s, 1H), 2.39 (s, 3H);  $^{13}\text{C}$  NMR (75 Hz,  $\text{CDCl}_3$ )  $\delta$  146.7, 138.6, 135.9, 129.9, 125.2, 125.0, 122.7, 122.3, 120.1, 119.3, 118.8, 113.4, 110.1, 110.0, 9.5;  $^{19}\text{F}$  NMR (282 MHz,  $\text{CDCl}_3$ ):  $\delta$  -59.0; IR (neat): 2922, 1607, 1513, 1457, 1260, 1222, 1167, 740  $\text{cm}^{-1}$ ; HRMS (EI) calcd for  $[\text{M}]^+$   $\text{C}_{16}\text{H}_{12}\text{F}_3\text{ON}$ : 291.0856, found: 291.0866.

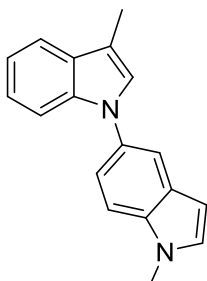

### 1',3-Dimethyl-1'H-1,5'-biindole (2m)

The indole **2m** was obtained (0.1 g, 39% yield) as a brownish solid from the one-pot reaction using N-methylindole-5-boronic acid.  $^1\text{H}$  NMR (400 MHz,  $\text{CDCl}_3$ ):  $\delta$  7.69 (d,  $J = 2.0$  Hz, 1H), 7.66-7.63 (m, 1H), 7.51-7.49 (m, 1H), 7.42 (d,  $J = 8.8$  Hz, 1H), 7.35-7.32 (m, 1H), 7.20-7.15 (m, 4H), 6.54 (dd,  $J = 2.8, 0.8$  Hz, 1H), 3.86 (s, 3H), 2.42 (d,  $J = 1.2$  Hz, 3H);  $^{13}\text{C}$  NMR (75 Hz,  $\text{CDCl}_3$ )  $\delta$  136.9, 135.2, 132.3, 130.2, 129.2, 128.8, 126.6, 121.9, 119.2, 119.2, 118.9, 116.8, 111.5, 110.4, 109.8, 101.2, 33.0, 9.6; IR (neat): 3048, 2914, 1572, 1497, 1458, 1330, 1236, 801, 757, 740, 722  $\text{cm}^{-1}$ ; HRMS (EI) calcd for  $[\text{M}]^+$   $\text{C}_{18}\text{H}_{16}\text{N}_2$ : 260.1305, found: 260.1308.

### References

1. Liwosz, T. W.; Chemler, S. R. *Chem. Eur. J.* **2013**, *19*, 12771-12777.
2. Miao, L.; Haque, I.; Manzoni, M. R.; Tham, W. S.; Chemler, S. R. *Org. Lett.* **2010**, *12*, 4739-4741.
3. Okuma, K.; Yasuda, T.; Takeshita, I.; Shioji, K.; Yokomori, Y. *Tetrahedron* **2007**, *63*, 8250-8254.
4. Mahesh, M.; Murphy, J. A.; LeStrat, F.; Wessel, H. P. *Beilstein J. Org. Chem.* **2009**, *5*, 1.
5. Yanai, H.; Mimura, H.; Kawada, K.; Taguchi, T. *Tetrahedron* **2007**, *63*, 2153-2160.
6. Antilla, J. C.; Buchwald, S. *Org. Lett.* **2001**, *3*, 2077-2079.
7. Maity, S.; Zheng, N. *Angew. Chem. Int. Ed.* **2012**, *51*, 9562-9566.
8. Zhu, C.; Ma, S. *Org. Lett.* **2013**, *15*, 2782-2785.
9. Jensen, T.; Pedersen, H.; Bang-Andersen, B.; Madsen, R.; Jørgensen, M. *Angew. Chem. Int. Ed.* **2008**, *47*, 888-890.
10. Verma, A. K.; Jha, R. R.; Chaudhary, R.; Tiwari, R. K.; Danodia, A. K. *Adv. Synth. Catal.* **2013**, *355*, 421-438.

$^1\text{H}$  and  $^{13}\text{C}$  Spectra

tw1-3-210p  
 Sample Name:  
 Data Collected on:  
 nmr300.chem.buffalo.edu-mercury300  
 Archive directory:  
 Sample directory:  
 FidFile: PROTON  
 Pulse Sequence: PROTON (s2pu1)  
 Solvent: cdcl3  
 Data collected on: May 13 2014  
 Temp. 25.0 C / 298.1 K  
 Operator: Chemler  
 Relax. delay 1.000 sec  
 Pulse 45.0 degrees  
 Acq. time 1.706 sec  
 Width 4800.8 Hz  
 8 repetitions  
 OBSERVE H1, 300.0738816 MHz  
 DATA PROCESSING  
 FT size 16384  
 Total time 0 min 23 sec

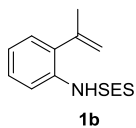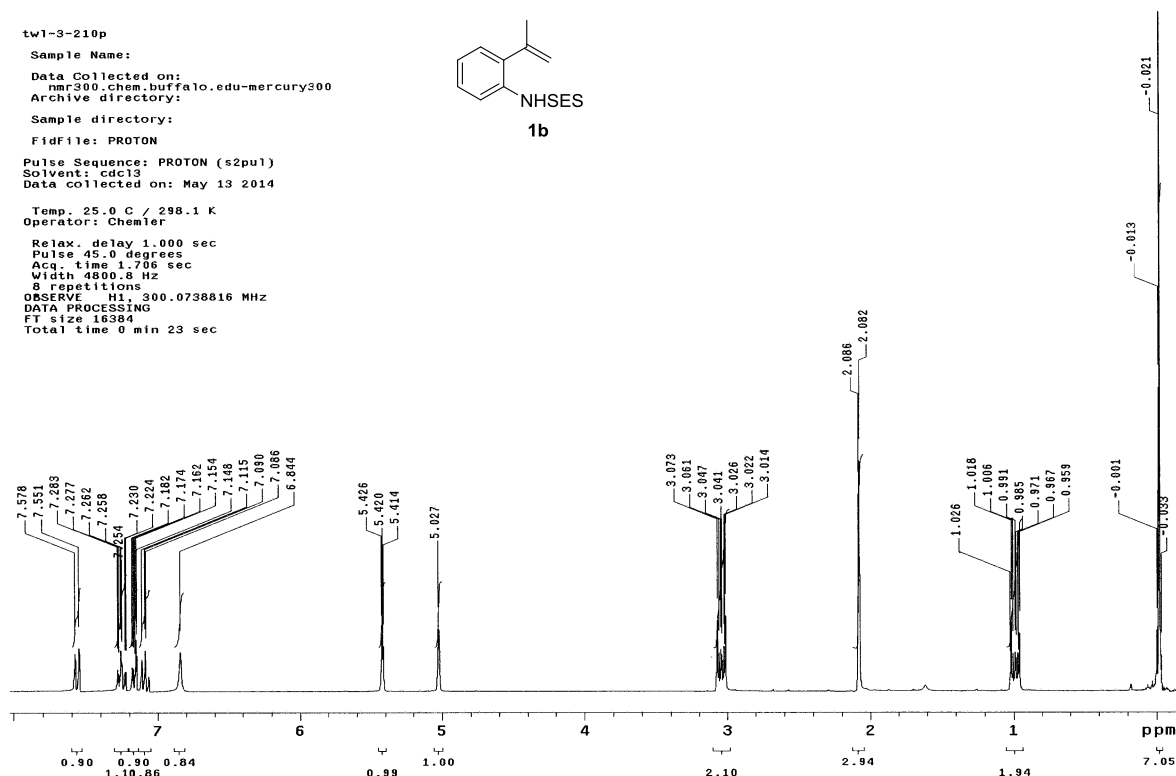

tw1-3-210carbon  
 Sample Name:  
 Data Collected on:  
 nmr300.chem.buffalo.edu-mercury300  
 Archive directory:  
 Sample directory:  
 FidFile: CARBON  
 Pulse Sequence: CARBON (s2pu1)  
 Solvent: cdcl3  
 Data collected on: May 13 2014  
 Temp. 23.5 C / 296.6 K  
 Operator: Chemler  
 Relax. delay 1.000 sec  
 Pulse 45.0 degrees  
 Acq. time 0.968 sec  
 Width 18867.9 Hz  
 384 repetitions  
 OBSERVE C13, 75.4536400 MHz  
 DECOUPLE H1, 300.0754450 MHz  
 Power 38 dB  
 continuously on  
 WALTZ-16 modulated  
 DATA PROCESSING  
 Line broadening 0.5 Hz  
 FT size 32766  
 Total time 3 hr

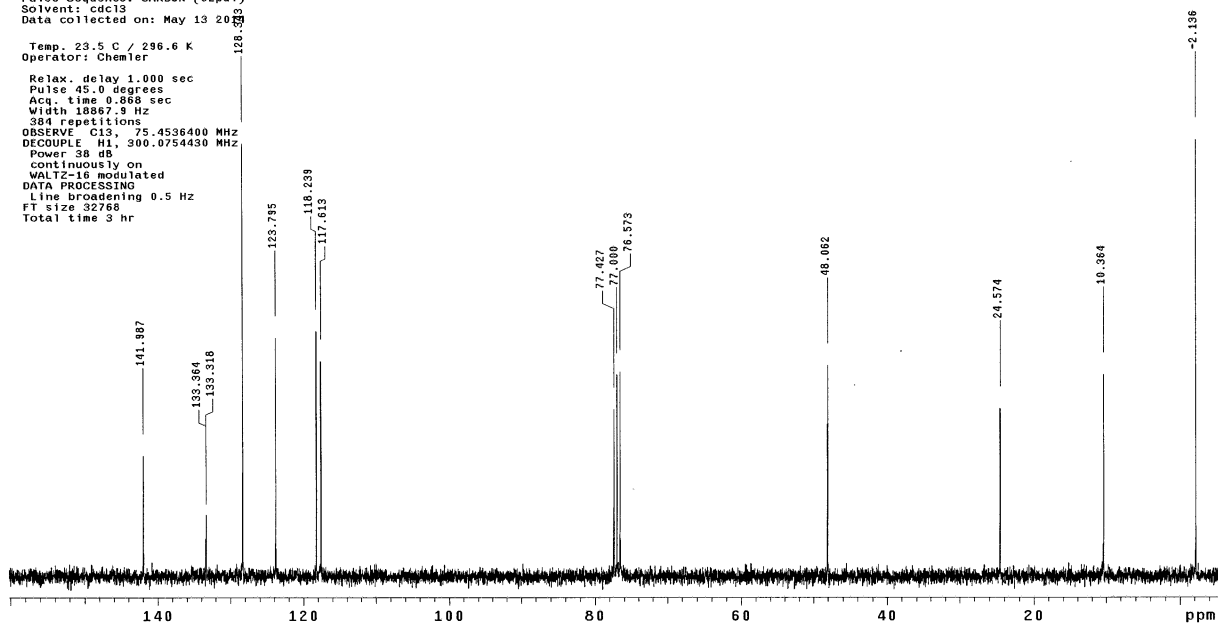

tw1-4-045p

Sample Name:

Data Collected on:  
nmr300.chem.buffalo.edu-mercury300

Archive directory:

Sample directory:

Fidfile: PROTON

Pulse Sequence: PROTON

Solvent: cdcl3

Data collected on:

Temp. 23.6 C

Operator: Chemler

Relax. delay 1.000 sec

Pulse 45.0 degrees

Acq. time 0.706 sec

Width 4000.0 Hz

8 repetitions

OBSERVE C13, 300.0738847 MHz

DATA PROCESSING

FT size 16384

Total time 0.71 min 23 sec

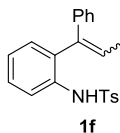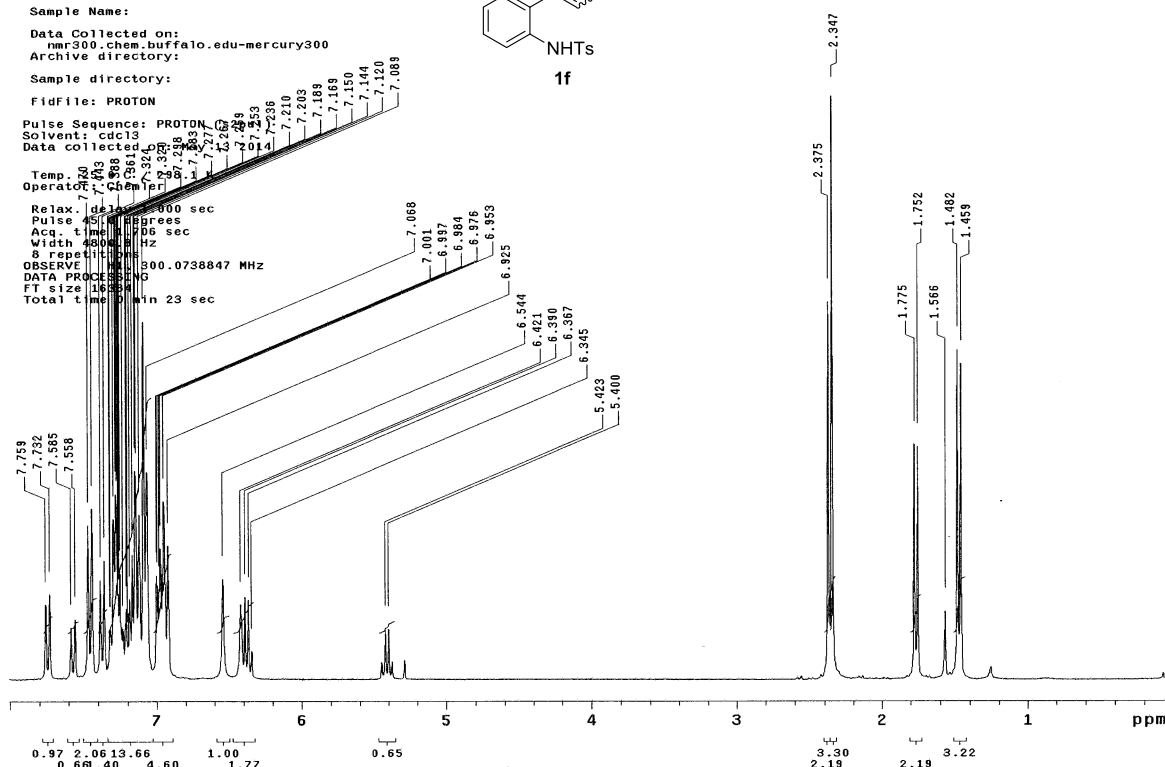

tw1-4-045carbon

Sample Name:

Data Collected on:  
nmr300.chem.buffalo.edu-mercury300

Archive directory:

Sample directory:

Fidfile: CARBON

Pulse Sequence: CARBON (s2pu1)

Solvent: cdcl3

Data collected on: May 13 2014

Temp. 23.6 C / 296.8 K

Operator: Chemler

Relax. delay 1.000 sec

Pulse 45.0 degrees

Acq. time 0.868 sec

Width 18867.9 Hz

552 repetitions

OBSERVE C13, 75.4536400 MHz

DECOUPLE H1, 300.0754430 MHz

Power 38 dB

continuously on

WALTZ-16 modulated

DATA PROCESSING

Line broadening 0.5 Hz

FT size 32768

Total time 1 hr, 12 min

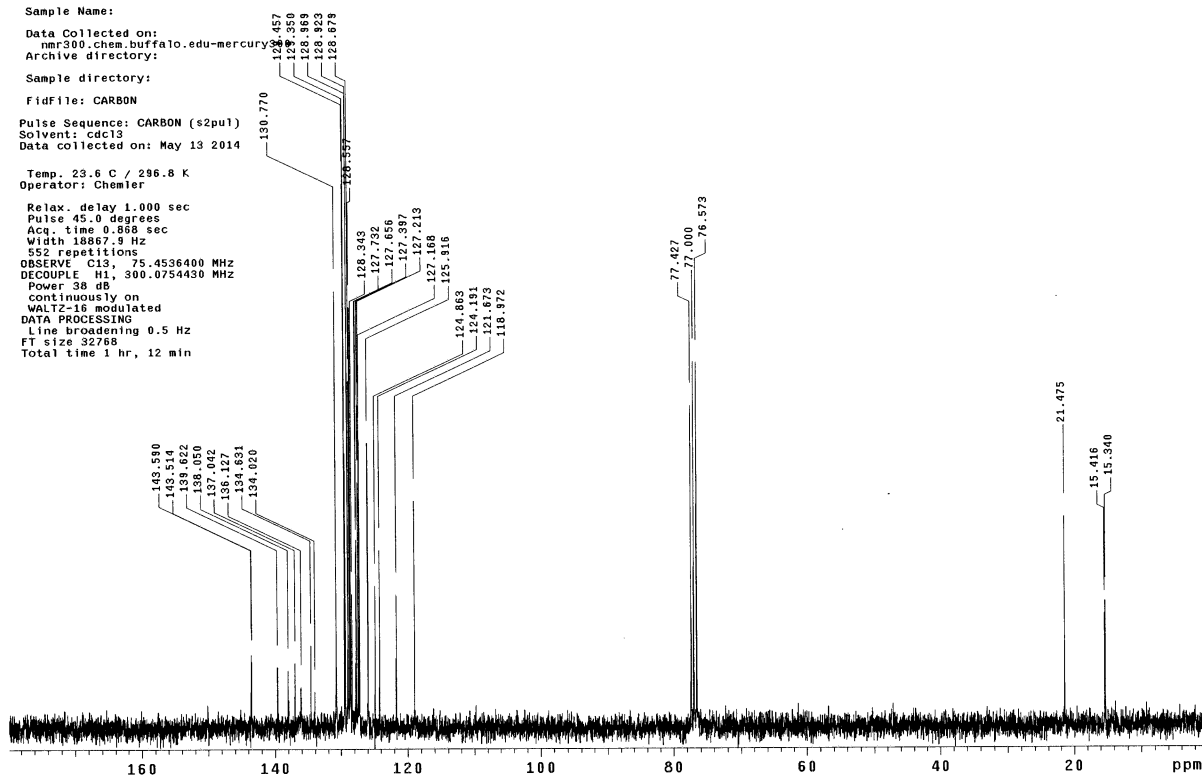

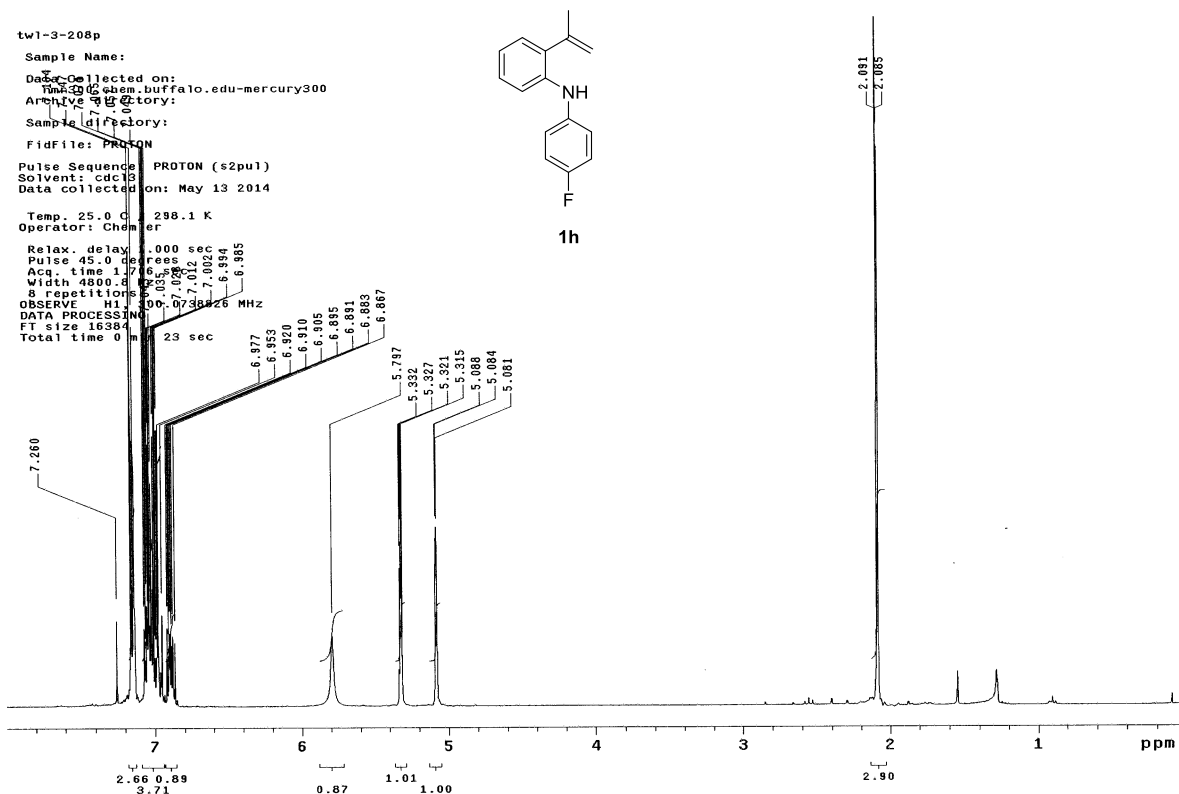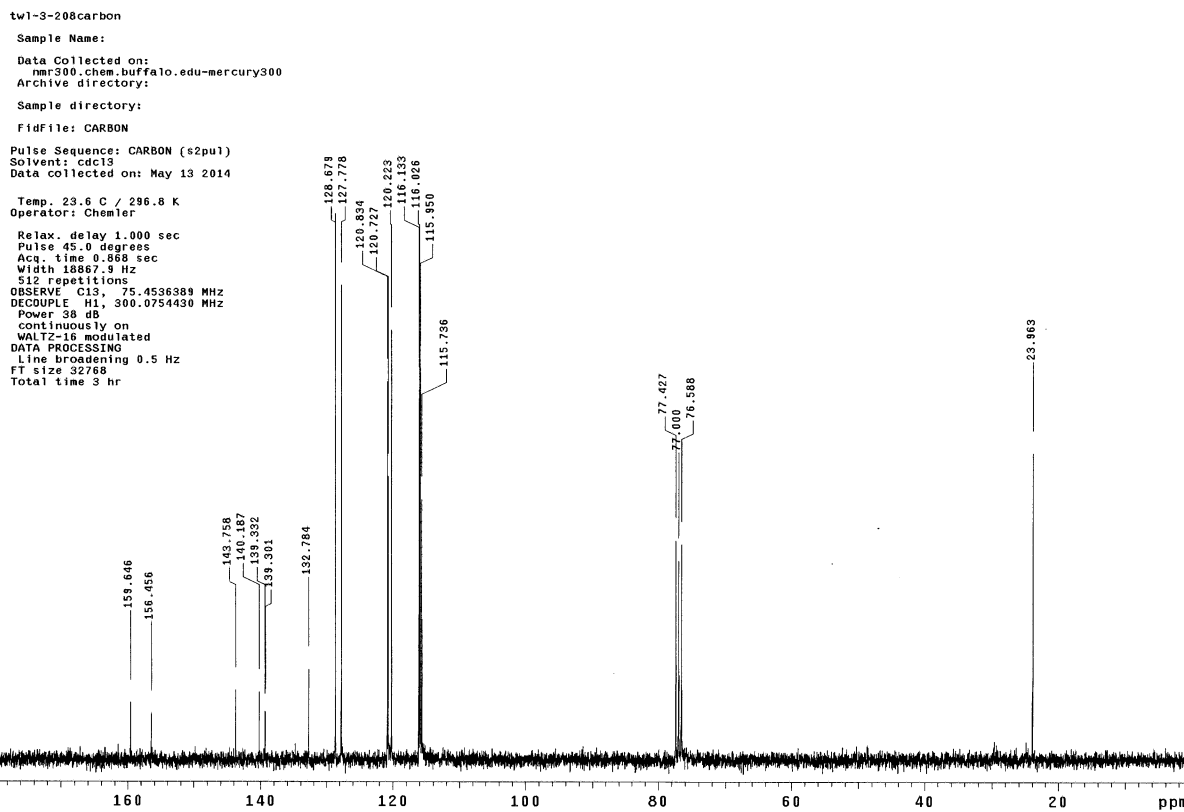

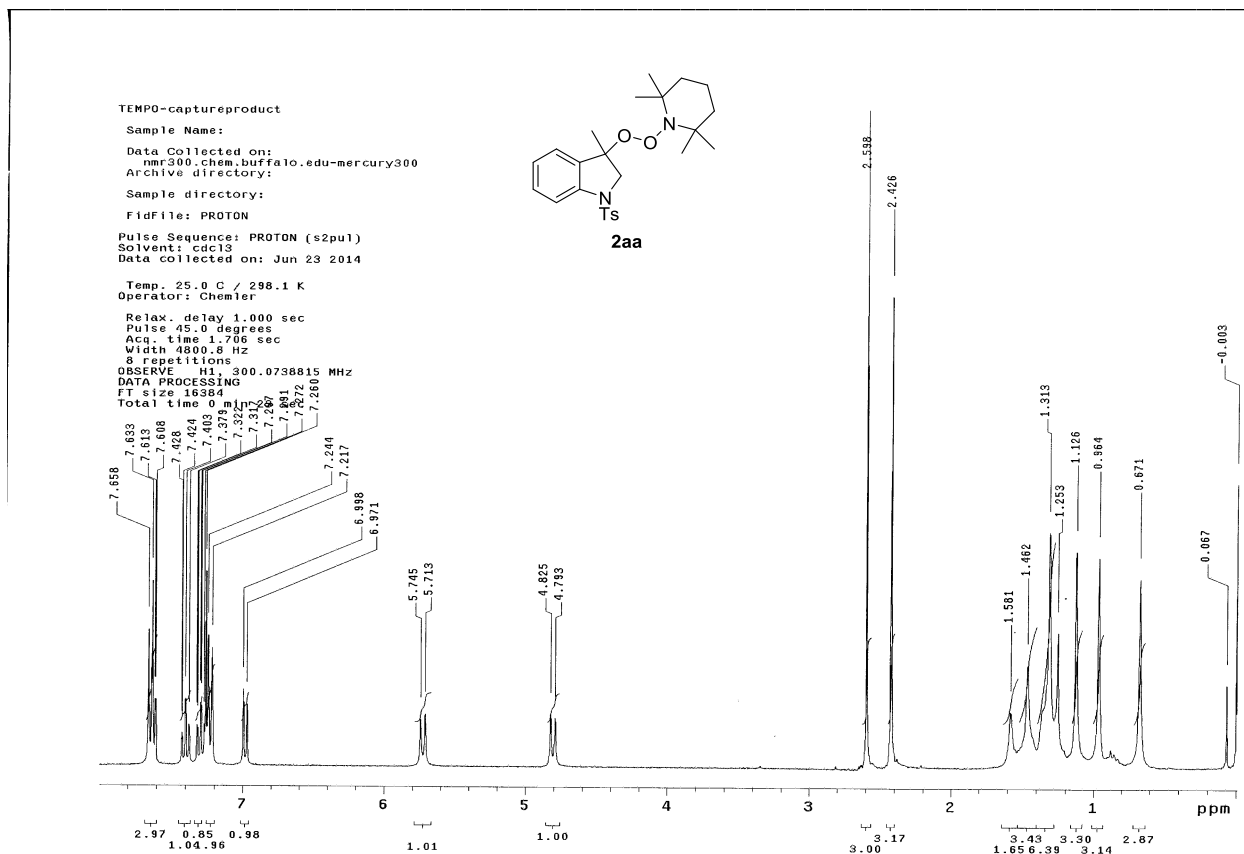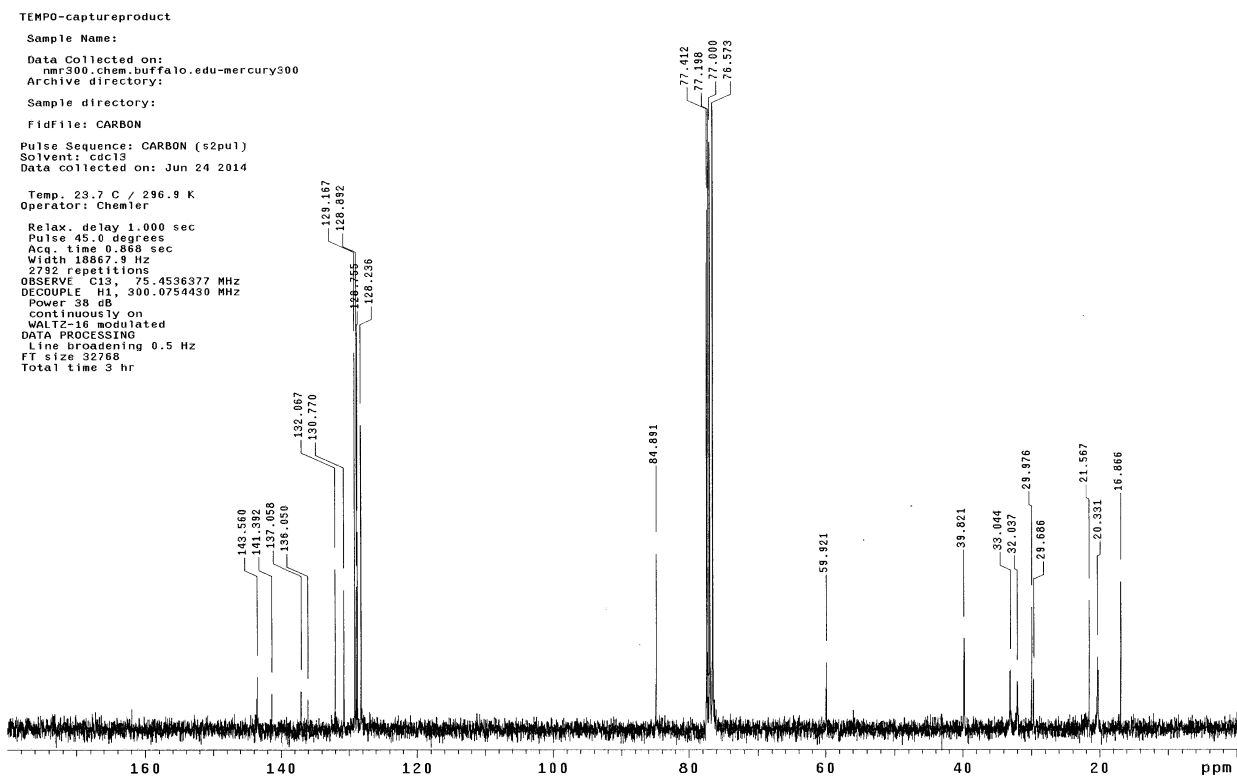

tw1-3-234p

Sample Name:

Data Collected on:  
nmr300.chem.buffalo.edu-mercury300

Archive directory:

Sample directory:

FidFile: PROTON

Pulse Sequence: PROTON (s2pu1)  
Solvent: cdcl3  
Data collected on: May 15 2014Temp. 25.0 C / 298.1 K  
Operator: ChemlerRelax. delay 1.000 sec  
Pulse 45.0 degrees  
Acq. time 1.706 sec  
Width 4800.8 Hz  
8 repetitions

OBSERVE H1, 300.0738815 MHz

DATA PROCESSING

FT size 16284

Total time 0 min 23 sec

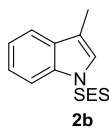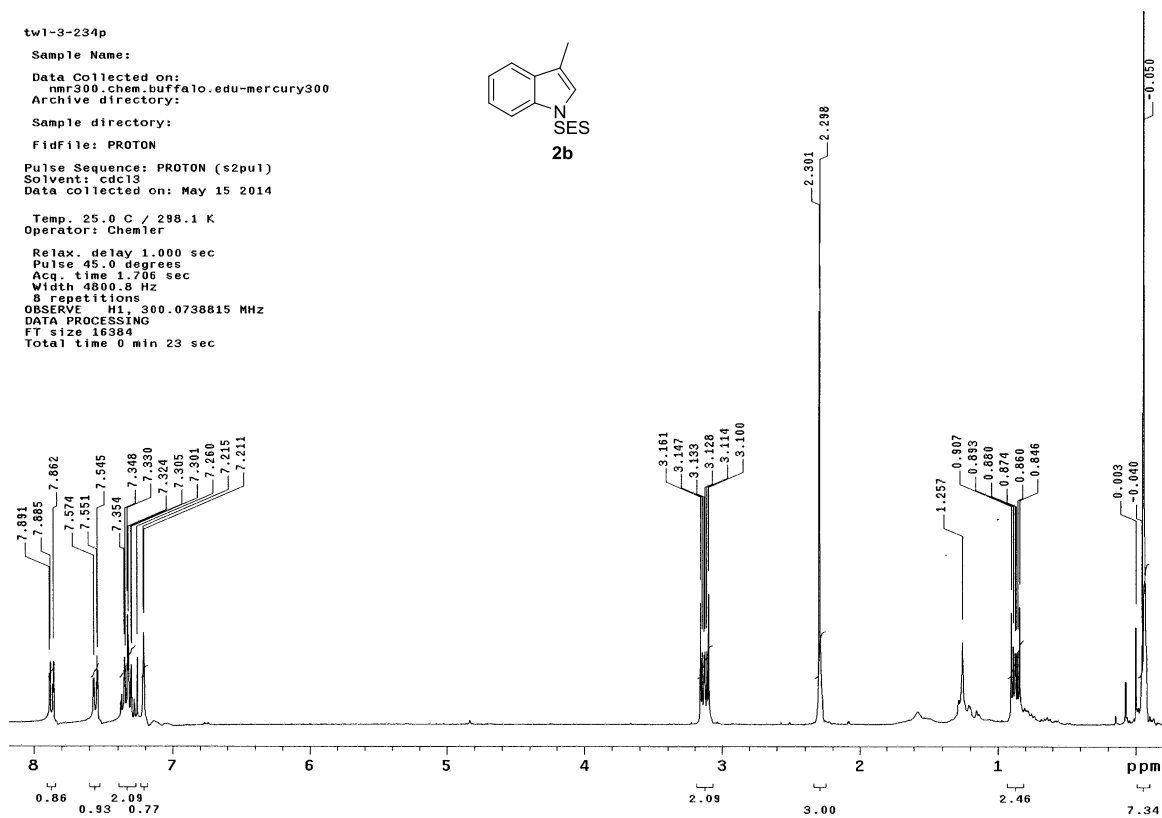

tw1-3-234carbon

Sample Name:

Data Collected on:  
nmr300.chem.buffalo.edu-mercury300

Archive directory:

Sample directory:

FidFile: CARBON

Pulse Sequence: CARBON (s2pu1)  
Solvent: cdcl3  
Data collected on: May 15 2014Temp. 23.7 C / 296.9 K  
Operator: ChemlerRelax. delay 1.000 sec  
Pulse 45.0 degrees  
Acq. time 0.868 sec  
Width 18867.3 Hz  
812 repetitions

OBSERVE C13, 75.4536377 MHz

DECOUPLE H1, 300.0754430 MHz

Power 38 dB

continuously on

WALTZ-16 modulated

DATA PROCESSING

Line broadening 0.5 Hz

FT size 32768

Total time 3 hr

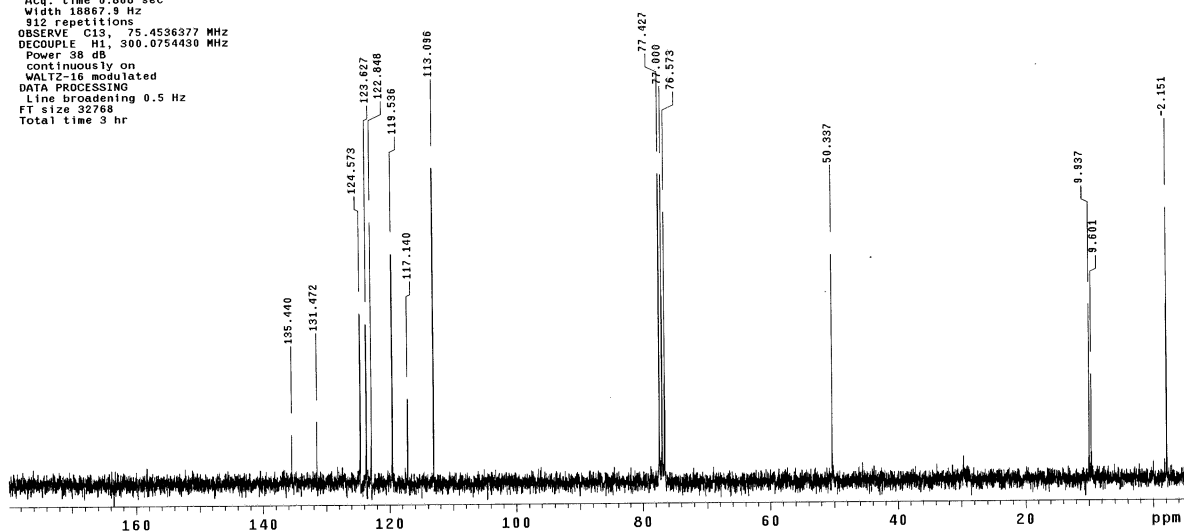

tw1-4-094p  
 Sample Name:  
 Data Collected on:  
 nmr300.chem.buffalo.edu-mercury300  
 Archive directory:  
 Sample directory:  
 Fidfile: PROTON  
 Pulse Sequence: PROTON (s2pu1)  
 Solvent: cdcl3  
 Data collected on: May 9 2014  
 Temp. 25.0 C / 298.1 K  
 Operator: Chemler

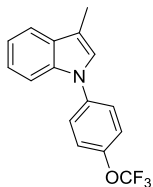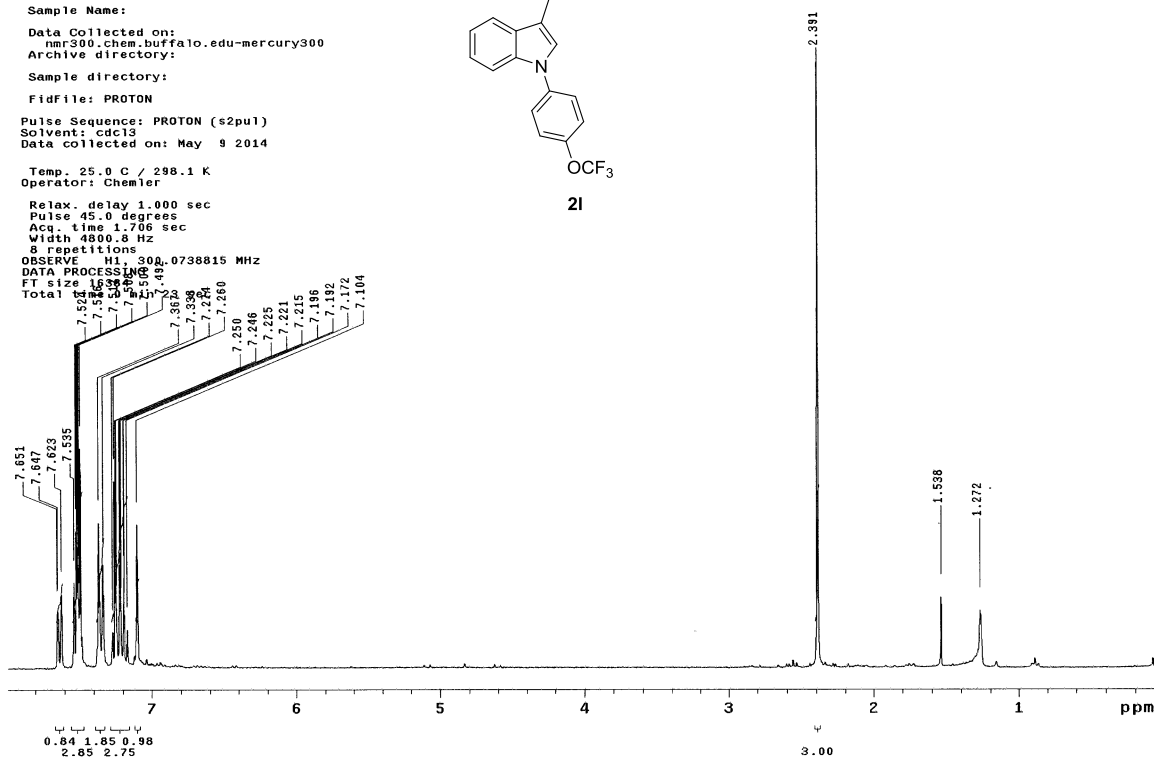

tw1-4-094carbon  
 Sample Name:  
 Data Collected on:  
 nmr300.chem.buffalo.edu-mercury300  
 Archive directory:  
 Sample directory:  
 Fidfile: CARBON

Pulse Sequence: CARBON (s2pu1)  
 Solvent: cdcl3  
 Data collected on: May 15 2014  
 Temp. 23.8 C / 296.9 K  
 Operator: Chemler  
 Relax. delay 1.000 sec  
 Pulse 45.0 degrees  
 Acq. time 0.868 sec  
 Width 18867.9 Hz  
 1558 repetitions  
 OBSERVE C13, 75.4536377 MHz  
 DECOUPLE H1, 300.0754430 MHz  
 Power 38 dB  
 continuously on  
 WALTZ-16 modulated  
 DATA PROCESSING  
 Line broadening 0.5 Hz  
 FT size 32768  
 Total time 1 hr, 30 min

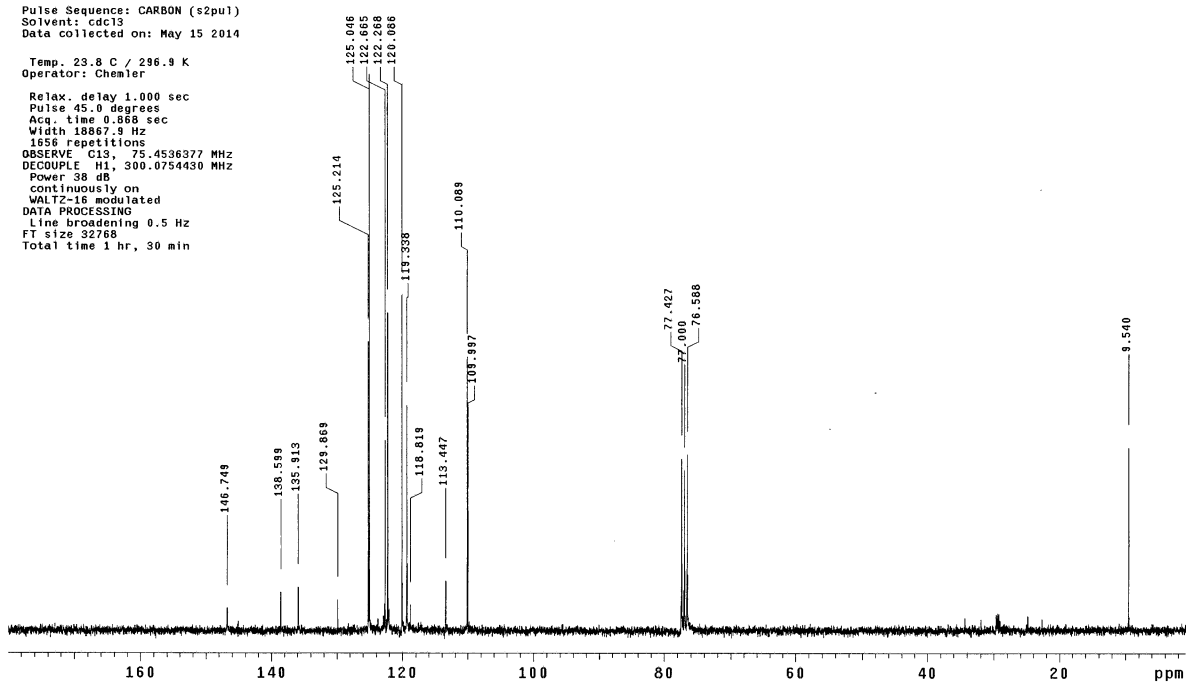

tw1-4-095p  
 Sample Name:  
 Data Collected on:  
 nmr300.chem.buffalo.edu-mercury300  
 Archive directory:  
 Sample directory:  
 FidFile: PROTON  
 Pulse Sequence: PROTON (s2pu1)  
 Solvent: cdcl3  
 Data collected on: May 16 2014  
 Temp. 25.0 C / 298.1 K  
 Operator: Chemler  
 Relax. delay 1.000 sec  
 Pulse 45.0 degrees  
 Acq. time 1.706 sec  
 Width 4800.8 Hz  
 8 repetitions  
 OBSERVE H1, 300.0738809 MHz  
 DATA PROCESSING  
 FT size 16384  
 Total time 0 min 23 sec

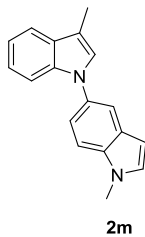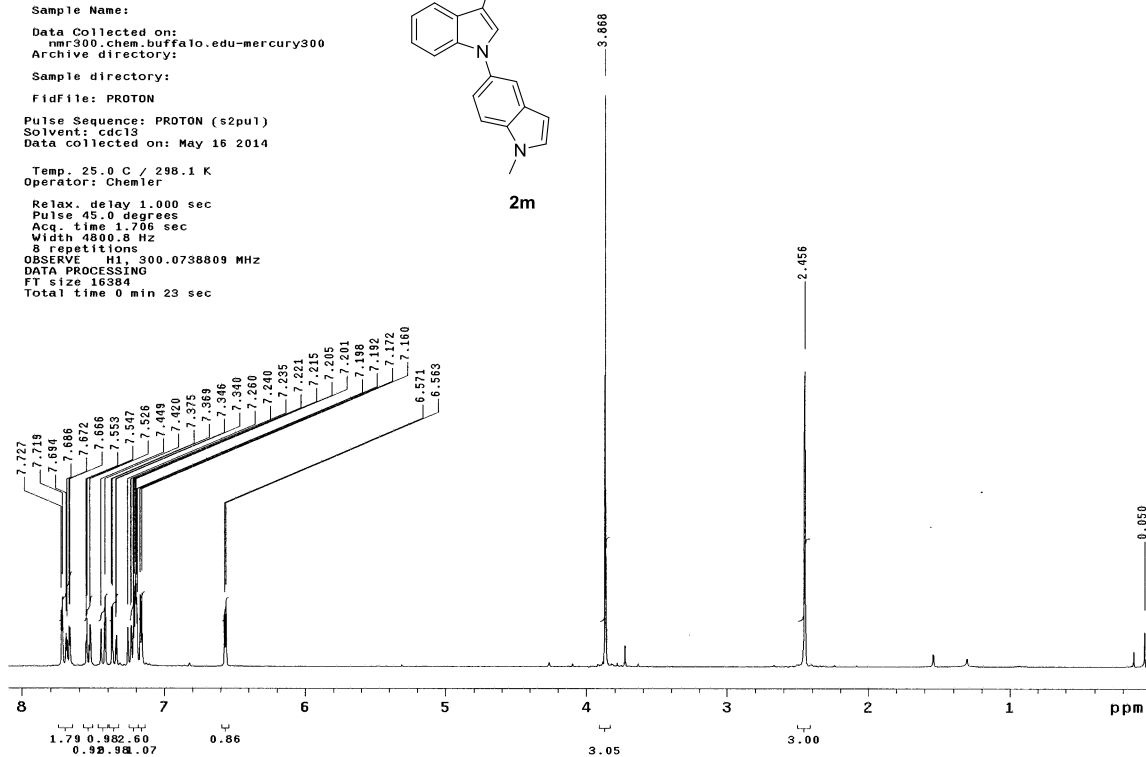

tw1-4-095carbon  
 Sample Name:  
 Data Collected on:  
 nmr300.chem.buffalo.edu-mercury300  
 Archive directory:  
 Sample directory:  
 FidFile: CARBON  
 Pulse Sequence: CARBON (s2pu1)  
 Solvent: cdcl3  
 Data collected on: May 16 2014  
 Temp. 23.6 C / 296.8 K  
 Operator: Chemler  
 Relax. delay 1.000 sec  
 Pulse 45.0 degrees  
 Acq. time 0.868 sec  
 Width 18867.9 Hz  
 782 repetitions  
 OBSERVE C13, 75.4536412 MHz  
 DECOUPLE H1, 300.0754430 MHz  
 Power 38 dB  
 continuously on  
 WALTZ-16 modulated  
 DATA PROCESSING  
 Line broadening 0.5 Hz  
 FT size 32768  
 Total time 1 hr, 48 min

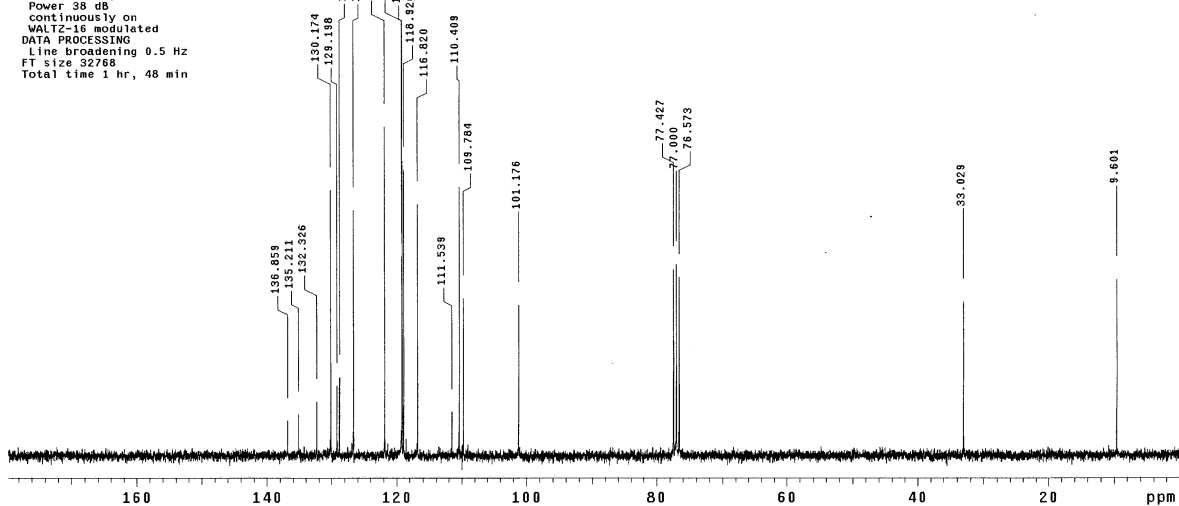

Supplement: NIHMS618846-supplement-Supporting_Information.pdf [file NIHMS618846-supplement-Supporting_Information.pdf]
